# Supplementary material for: Desensitisation to cigarette package graphic health warnings: a cohort comparison between London and Singapore
Source: PubMed Central journal article supplement — BMJ Open. 2016 Oct 24;6(10):e012693. doi: 10.1136/bmjopen-2016-012693 (PMC5093627; doi:10.1136/bmjopen-2016-012693), 2016-10-24
Supplement: bmjopen-2016-012693supp_tables.pdf [file bmjopen-2016-012693supp_tables.pdf]

## Desensitisation to cigarette package graphic health warnings:

### a cohort comparison between London and Singapore

**Table E1:** Demographic data – smokers; London and Singapore

|                    | All<br>(n=112) | London<br>(n=57) | Singapore<br>(n=55) | X <sup>2</sup> /one-way<br>ANOVA<br>(p-value) |
|--------------------|----------------|------------------|---------------------|-----------------------------------------------|
| Age, mean (SD)     | 53.6 (15.6)    | 51.5 (15.7)      | 55.8 (15.4)         | 0.147                                         |
| Male, n (%)        | 83 (74%)       | 38 (67%)         | 45 (82%)            | 0.067                                         |
| Female, n (%)      | 29 (26%)       | 19 (33%)         | 10 (18%)            |                                               |
| Chinese            | 40 (36%)       | 0 (0%)           | 40 (73%)            | <0.001                                        |
| White              | 45 (40%)       | 45 (79%)         | 0 (0%)              | <0.001                                        |
| Asian/Asian other  | 21 (19%)       | 7 (12%)          | 14 (25%)            | 0.074                                         |
| Black/ Black other | 5 (4%)         | 5 (9%)           | 0 (0%)              | 0.025                                         |
| Mixed              | 1 (1%)         | 0 (0%)           | 1 (2%)              | 0.307                                         |

**Table E2:** Demographic data – non-smokers; London and Singapore

|                    | All<br>(n=154) | London<br>(n=106) | Singapore<br>(n=48) | X <sup>2</sup> /one-way<br>ANOVA<br>(p-value) |
|--------------------|----------------|-------------------|---------------------|-----------------------------------------------|
| Age, mean (SD)     | 54.9 (17.6)    | 52.8 (19.0)       | 59.7 (13.1)         | <b>0.026</b>                                  |
| Male, n (%)        | 84 (55%)       | 50 (48%)          | 33 (69%)            | <b>0.013</b>                                  |
| Female, n (%)      | 70 (45%)       | 56 (52%)          | 15 (31%)            |                                               |
| Chinese            | 33 (21%)       | 0 (0%)            | 33 (69%)            | <0.001                                        |
| White              | 84 (55%)       | 84 (79%)          | 0 (0%)              | <0.001                                        |
| Asian/Asian other  | 24 (16%)       | 10 (9%)           | 14 (29%)            | <b>0.002</b>                                  |
| Black/ Black other | 9 (6%)         | 9 (8%)            | 0 (0%)              | <b>0.037</b>                                  |
| Mixed              | 4 (3%)         | 3 (3%)            | 1 (2%)              | 0.787                                         |

**Table E3:** Spearman coefficient and Mann-Whitney/ Kruskal-Wallis testing for participant demographic data (age, gender, ethnicity, occupation and smoking status) on the main outcome measures: awareness of smoking risks, emotional response to, and processing of GHWL

| Demographic                    | Knowledge     | Emotion      |               |               | Process      |               |
|--------------------------------|---------------|--------------|---------------|---------------|--------------|---------------|
|                                |               | Total        | Fear          | Disgust       |              | Avoid         |
| Age (r/ p)                     | .063          | <b>-.160</b> | <b>-.181</b>  | -.092         | -.081        | <b>-.149</b>  |
|                                | .308          | <b>.009</b>  | <b>.003</b>   | .134          | .189         | <b>.009</b>   |
| Gender (z/ p)                  | 1.292         | .830         | .146          | .704          | .899         | 1.246         |
|                                | .071          | .495         | 1.000         | .705          | .395         | .090          |
| Ethnicity (x <sup>2</sup> / p) | <b>53.324</b> | 8.572        | <b>11.669</b> | <b>16.738</b> | 4.530        | <b>26.618</b> |
|                                | <b>.000</b>   | .127         | <b>.040</b>   | <b>.005</b>   | .476         | <b>.001</b>   |
| Occupation                     | .028          | <b>-.124</b> | -.103         | -.054         | <b>-.128</b> | .048          |
|                                | .657          | <b>.046</b>  | .095          | .381          | <b>.039</b>  | .439          |
| Smoking status (z/ p)          | .956          | 1.117        | <b>1.995</b>  | .946          | .043         | .706          |
|                                | .320          | .165         | <b>.001</b>   | .332          | 1.000        | .701          |

**Table E4:** Results of Kruskal-Wallis testing the relationship between ethnicity the awareness of smoking related diseases

| Race               | n   | Knowledge (mean rank) | Processing (mean rank) |
|--------------------|-----|-----------------------|------------------------|
| Caucasian          | 129 | 100.30                | 151.25                 |
| Chinese            | 73  | 168.28                | 100.49                 |
| Malay              | 14  | 194.32                | 96.71                  |
| Indian             | 27  | 153.06                | 120.06                 |
| Black/ black other | 14  | 105.43                | 143.96                 |
| Mixed/other        | 9   | 158.81                | 160.94                 |

**Table E5:** Percentage of participants that chose to prevent or treat each health risk when only one could be chosen: London (L) vs Singapore (S) overall, and by smoking status

|                              | All |     |              | Non-smokers |     |              | Smokers |     |              |
|------------------------------|-----|-----|--------------|-------------|-----|--------------|---------|-----|--------------|
|                              | S   | L   | p-value      | S           | L   | p-value      | S       | L   | p-value      |
| <b>Prevention (only one)</b> |     |     |              |             |     |              |         |     |              |
| Heart disease                | 17% | 21% | 0.320        | 17%         | 25% | 0.303        | 16%     | 16% | 0.934        |
| Stroke                       | 12% | 8%  | 0.317        | 11%         | 10% | 0.961        | 13%     | 4%  | 0.073        |
| Blindness                    | 13% | 16% | 0.455        | 6%          | 14% | 0.169        | 18%     | 19% | 0.880        |
| Mouth & throat cancer        | 1%  | 10% | <b>0.004</b> | 0%          | 10% | <b>0.022</b> | 2%      | 9%  | 0.102        |
| Lung cancer                  | 52% | 44% | 0.158        | 64%         | 40% | <b>0.006</b> | 42%     | 49% | 0.438        |
| <b>Treatment (only one)</b>  |     |     |              |             |     |              |         |     |              |
| Heart disease                | 19% | 23% | 0.525        | 21%         | 25% | 0.662        | 18%     | 19% | 0.880        |
| Stroke                       | 13% | 6%  | 0.067        | 13%         | 8%  | 0.412        | 13%     | 2%  | <b>0.024</b> |
| Blindness                    | 13% | 20% | 0.137        | 6%          | 20% | <b>0.035</b> | 18%     | 19% | 0.880        |
| Mouth & throat cancer        | 1%  | 7%  | <b>0.019</b> | 0%          | 8%  | <b>0.039</b> | 2%      | 5%  | 0.326        |
| Lung cancer                  | 49% | 43% | 0.371        | 57%         | 38% | <b>0.023</b> | 40%     | 51% | 0.248        |

**Table E6:** Emotional response after viewing GHWL: Overall response, and all non-smokers vs all smokers

|                            | <b>All respondents</b> | <b>Non-smokers</b> | <b>Smokers</b> | <b>P value</b>   |
|----------------------------|------------------------|--------------------|----------------|------------------|
| Experienced fear           | 137/266 (52%)          | 95/154 (62%)       | 41/112 (37%)   | <b>&lt;0.001</b> |
| Experienced disgust        | 183/266 (69%)          | 114/154 (74%)      | 68/112 (61%)   | <b>0.021</b>     |
| Avoiding looking at labels | 76/266 (29%)           | 41/154 (27%)       | 34/112 (30%)   | 0.504            |

**Table E7:** Processing of GHWL based on the mean (standard deviation) of a score on a nominal scale from 1 to 5: Overall response, and all smokers vs all non-smokers

|                                                      | <b>All respondents</b> | <b>Non-smokers</b> | <b>Smokers</b> | <b>P value</b>   |
|------------------------------------------------------|------------------------|--------------------|----------------|------------------|
| How carefully read GHWL messages (/5) (SD)           | 2.06 (1.20)            | 1.97 (1.23)        | 2.19 (1.16)    | 0.152            |
| How often read GHWL messages (/5) (SD)               | 2.05 (1.23)            | 2.01 (1.30)        | 2.09 (1.13)    | 0.617            |
| How often thought about GHWL messages (/5) (SD)      | 2.14 (1.29)            | 2.18 (1.35)        | 2.08 (1.22)    | 0.551            |
| Ever talked about GHWLs (/5) (SD)                    | 1.95 (1.31)            | 2.09 (1.40)        | 1.75 (1.16)    | <b>&lt;0.043</b> |
| Ever thought about GHWLs when not in sight (/5) (SD) | 1.58 (1.03)            | 1.58 (1.10)        | 1.58 (0.93)    | 0.982            |
| Ever kept a GHWL (/5) (SD)                           | 1.16 (0.74)            | 1.13 (0.59)        | 1.13 (0.59)    | 0.664            |
